# Supplementary material
Source: HighWire-hosted journal article supplement (https://bmjopenquality.bmj.com/content/8/3/e000684)
Supplement: inline-supplementary-material-1 [file inline-supplementary-material-1.docx]

Quality Improvement Confidence Questions

How confident are you that you can design and implement a change to improve health care in a local setting?

**Not at all Slightly Moderately Extremely**

   

How comfortable are you in your current skills with the following aspects of quality improvement?

**Not at all Slightly Moderately Extremely**

a. Writing a clear problem statement (goal, aim)    

b. Applying evidence based professional    

knowledge

c. Using measurement to improve your skills     

d. Studying the process    

e. Making changes in a system    

f. Identifying whether a change leads to an     

improvement in your skills

g. Using small cycles of change    

h. Identifying best practices and comparing    

these to the practices of your local team

(e.g. general practice support team)

i. Implementing a structured plan to test a change    

j. Using the PDSA model as a systematic    

framework for trial and learning

k. Identifying how data are linked to specific    

processes

l. Building your next improvement upon prior    

success or failure
